# Supplementary material for: Single-cell tracking of flavivirus RNA uncovers species-specific interactions with the immune system dictating disease outcome
Source: Nat Commun. 2017 Mar 14;8:14781. doi: 10.1038/ncomms14781 (PMC5424064; doi:10.1038/ncomms14781)
Supplement: Supplementary Information — Supplementary Figures and Supplementary Tables [file ncomms14781-s1.pdf]

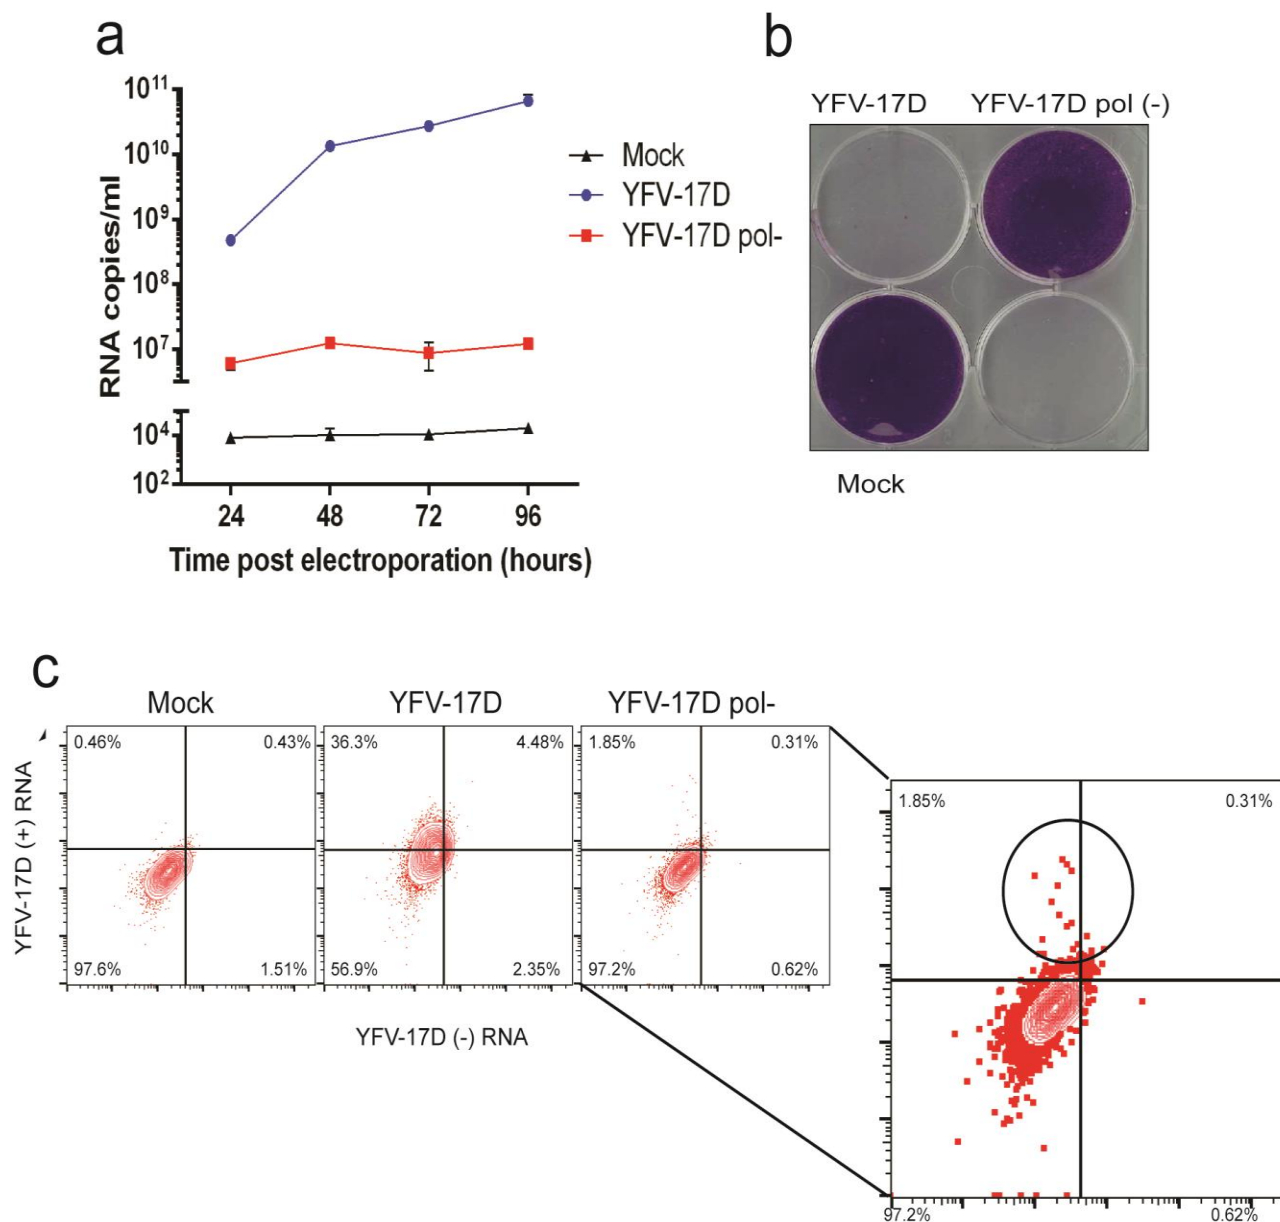

**Supplementary Figure 1. a.** Quantification by RT-qPCR of YFV-17D and YFV-17D pol- (+) RNA in the supernatant of cultured Huh7.5 cells following viral RNA electroporation of respective viruses over a four days course of infection (mean  $\pm$  SD;  $n=3$ ). **b.** Cytopathic effect observed in Huh7.5 four days following electroporation of YFV-17D and YFV-17D pol- RNA. **c.** Representative FACS plots of Huh7.5 electroporated with YFV-17D or YFV-17D pol- RNA and processed using the YFV RNA flow procedure at 36h post electroporation. Cells were stained with both the (+) and (-) YFV RNA probe set. Presence of cells electroporated with YFV-17D pol- and still harboring YFV RNA at 36h post infection is highlighted by a black circle.

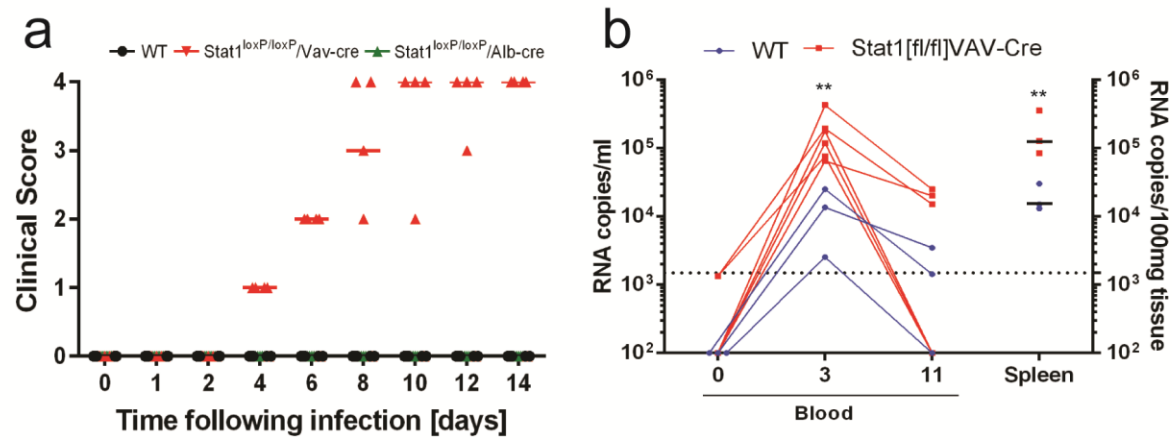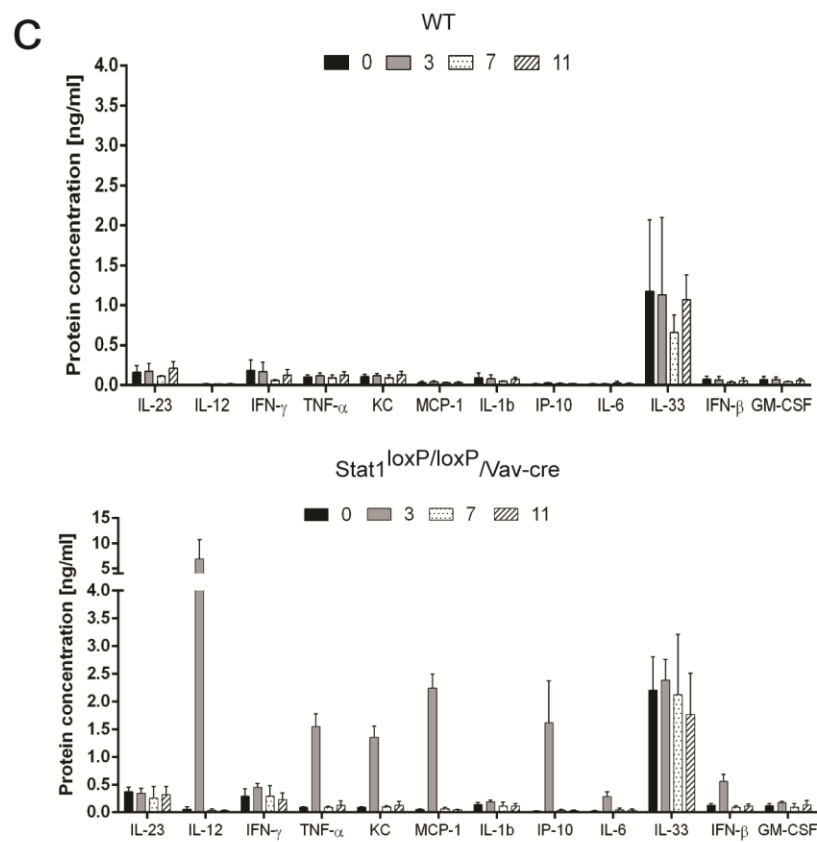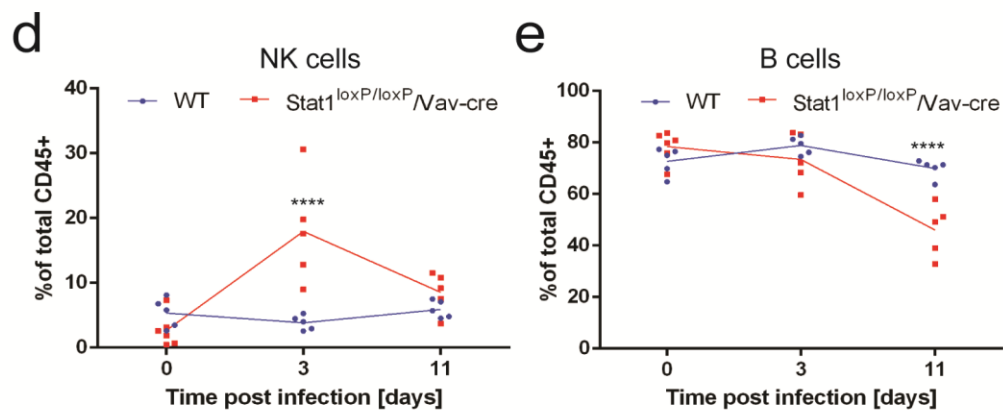

**Supplementary Figure 2.** **a.** Clinical scoring of C57BL/6 mice (WT),  $\text{stat1}^{\text{loxP/loxP}}/\text{Alb-cre}$  and  $\text{stat1}^{\text{loxP/loxP}}/\text{Vav-cre}$  mice over the course of YFV-17D infection (n=5). **b.** Serum viremia over the course of infection (blood) and spleen viral load at day 11 post infection (spleen) of an additional cohort of C57BL/6 mice (WT) and  $\text{stat1}^{\text{loxP/loxP}}/\text{Vav-cre}$  mice infected with YFV-17D. (+) RNA copies per ml were quantified by RT-qPCR. Medians are shown for the spleen viral loads (n=3-6 per group; \*\* $p<0.01$ ; Two-way ANOVA test). **c.** Protein concentration of a panel of 12 cytokines in the serum of WT (top) and  $\text{stat1}^{\text{loxP/loxP}}/\text{Vav-cre}$  (bottom) mice at days 0, 3, 7 and 11 following YFV-17D injection (mean  $\pm$  SD; n=3). **d-e.** Frequency of peripheral NK cells (**d**) and B cells (**e**) over time following infection of WT (blue) and  $\text{stat1}^{\text{loxP/loxP}}/\text{Vav-cre}$  mice (red) with YFV-17D. Frequencies are expressed as percentage of total murine CD45+ cells (n=5 per group). Lines are linking the mean of each time point (n=5 per group; \*\*\*\* $p<0.0001$ ; Two-way ANOVA test).

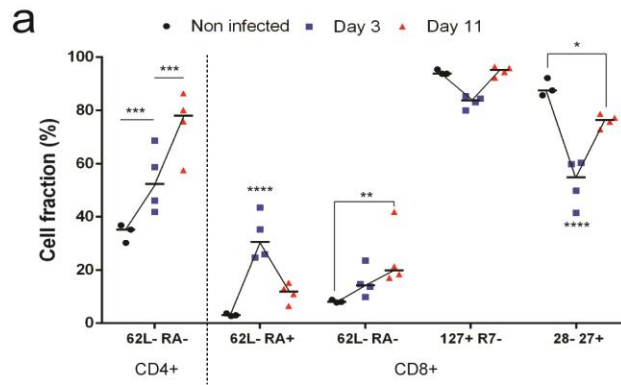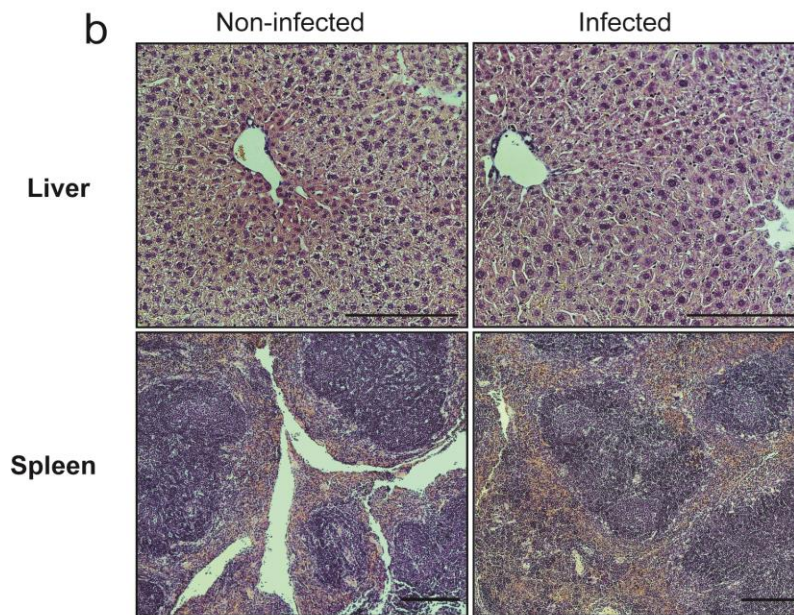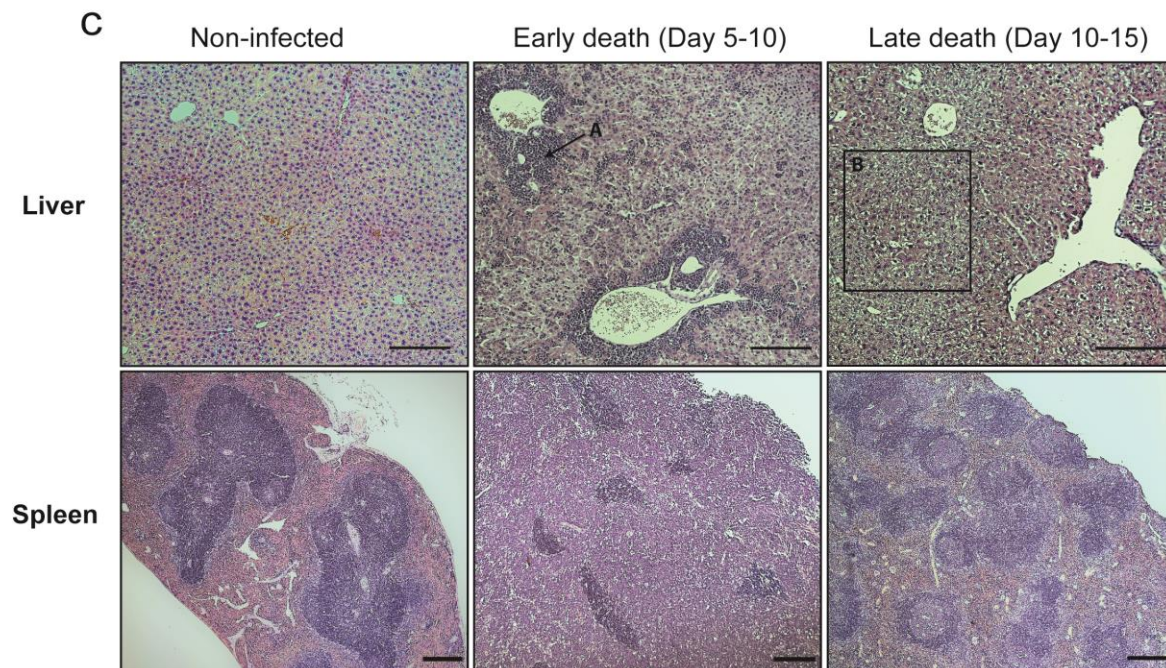

**Supplementary Figure 3. a.** Evolution of expression of CD62L, CD45RA, CD127, CCR7, CD27 and CD28 surface markers on spleen-resident CD3+CD4+ and CD3+CD8+ T cells isolated from non-infected or YFV-17D infected stat1<sup>loxP/loxP</sup>/Vav-cre mice over the course of infection (days 3 and 11 post infection). Medians are shown and linked by a black line for each marker combination (n=3-4 per group; \* $p < 0.05$ , \*\* $p < 0.01$ , \*\*\* $p < 0.001$ , \*\*\*\* $p < 0.0001$ ; Two-way ANOVA test). **b.** Hematoxylin and eosin staining of liver (20x magnification) and spleen (10x magnification) tissue sections from non-infected and YFV-17D infected WT mice (day 11 post infection). **c.** Hematoxylin and eosin staining of liver (10x magnification) and spleen (4X magnification) tissue sections from non-infected and YFV-17D infected stat1<sup>loxP/loxP</sup>/Vav-cre mice experiencing early (day 3-5 post infection) or late death (day 10-15 post infection). For each experimental condition (non-infected or infected) and tissue (Liver and Spleen), 6 tissue sections from three biological replicates (3 animals) were examined. Histopathological manifestations observed in infected animal tissues were absent from all examined non-infected animals, and were representative of three biological replicate, for a given type of tissue. Scale bar (200 $\mu$ m) are indicated for each picture. A, severe portal inflammation; B, representative area displaying hydropic changes.

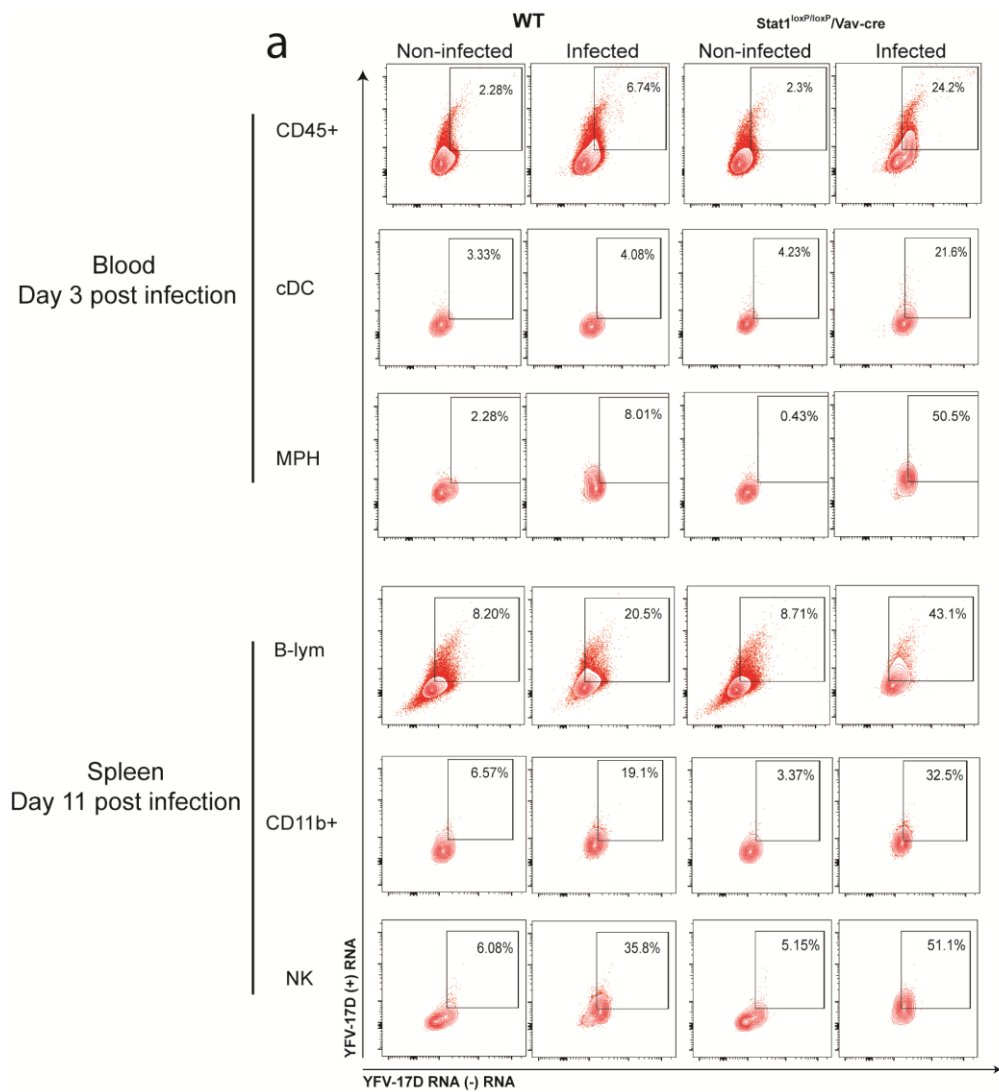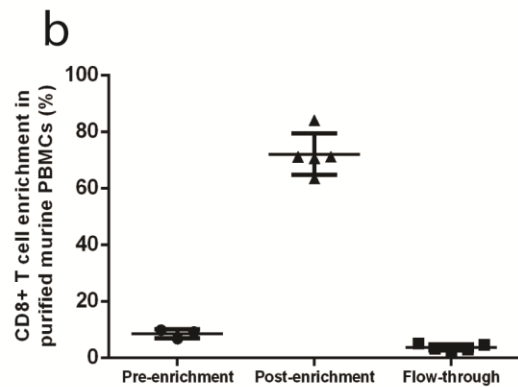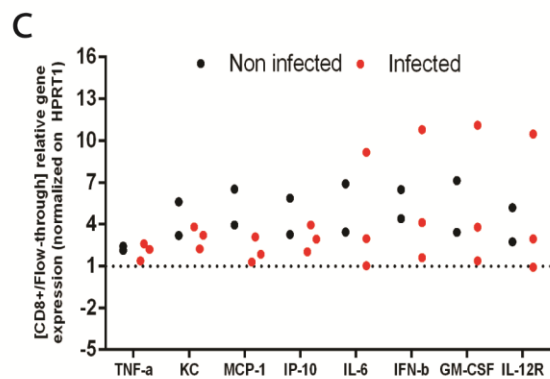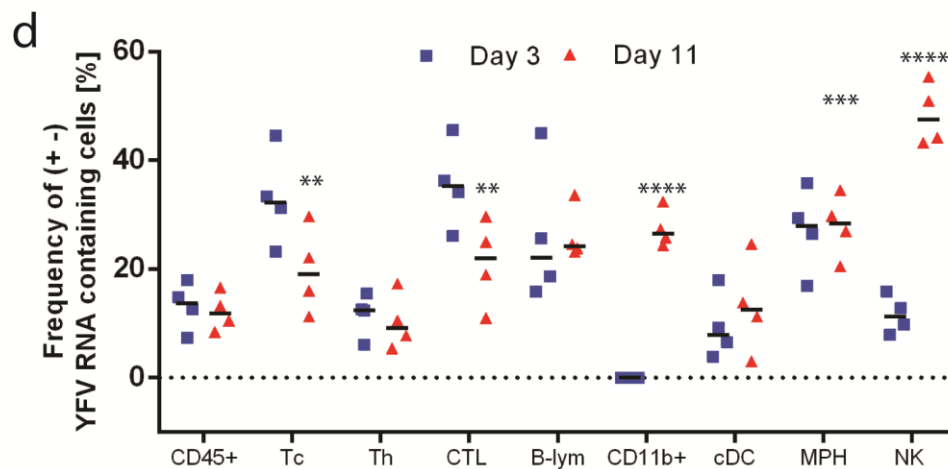

**Supplementary Figure 4.** **a.** Representative FACS plots displaying the frequencies of multiple peripheral (blood, top panel) or spleen-resident (spleen, bottom panel) immune cell subsets containing both (+) and (-) YFV-17D RNA following YFV-17D infection of WT and  $\text{stat1}^{\text{loxP/loxP/Vav-cre}}$  mice. Frequencies from non-infected mice are also displayed. **b.** Enrichment efficiency of CD3+ CD8+ T cells from total blood of  $\text{stat1}^{\text{loxP/loxP/Vav-cre}}$  mice in a non-infected or infected setting. Frequencies before (pre-enrichment), after (post-enrichment) and of the flow-through are displayed. (mean  $\pm$  SD; n=5). **c.** Enrichment in CD3+ CD8+ T cells of mRNA coding for multiple cytokines and cytokine receptors. CD3+ CD8+ were isolated from non-infected and YFV-17D infected  $\text{stat1}^{\text{loxP/loxP/Vav-cre}}$  and the expression ratio for multiple cytokines and cytokine receptors between the CD8+ enriched fraction and flow-through was determined. Expression of each gene was normalized to HRPT1 expression prior to ratio calculation. (mean  $\pm$  SD; n=5). **d.** Frequency of cells containing both (+) and (-) YFV RNA in multiple subsets of spleen-resident murine CD45+ cells of  $\text{stat1}^{\text{loxP/loxP/Vav-cre}}$  mice (red) at days 3 and 11 post infection. (n=5-6 per group; \*\* $p < 0.01$ , \*\*\* $p < 0.001$ , \*\*\*\* $p < 0.0001$ ; Two-way ANOVA test). Tc, CD3+ T cells; Th, CD4+ T cells; CTL, CD8+ T cells; B-lym, CD19+ B cells; CD11b+, CD3- CD19- CD11b+ cells; cDC, CD3- CD19- CD11c+ conventional dendritic cells; MPH, CD3- CD19- CD11b+ F4/80+ macrophages; NK, CD3- CD19- CD161+ NK cells. Details in population gating are described in materials and methods.

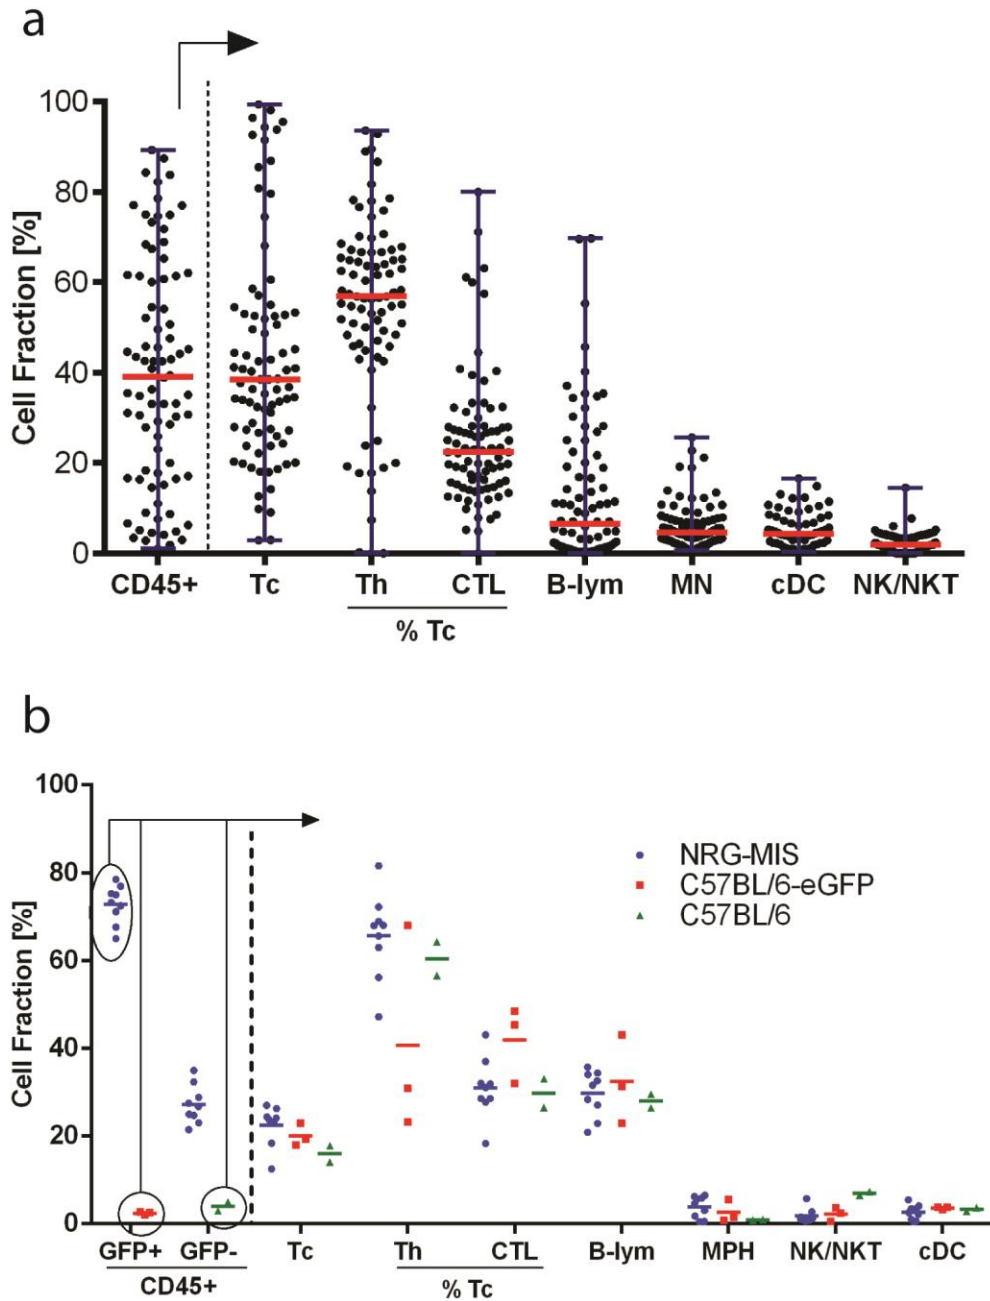

**Supplementary Figure 5.** Immune system reconstitution in NRG-HIS (**a**, n=82.) and NRG-MIS (**b**, n=9) mice. Frequency of each cell fraction is shown as percentage of CD45+ cells, with the exception of Th and CTL, which are displayed as a percentage of CD3+ T cells. Medians are shown for each cell subset frequency. In panel b, the immune cell subset frequencies of NRG-MIS (blue), C57BL/6-eGFP (red) and C57BL/6 (green) are shown. For each mouse strain, the CD45+ cell population analyzed is circled (CD45+ GFP+ cells or CD45+ GFP- cells). T-lym, CD3+ T cells; Th, CD3+ CD4+ T cells; CTL, CD3+ CD8+ T cells; cDC, CD11c+ conventional dendritic cells; B-lym, CD19+ B cells; Human MN, human CD14+ monocytes; Murine MPH, murine CD11b+ F4/80+ macrophages; Human NK/NKT, human CD56+ NK/NKT cells; Murine NK, murine CD161+ NK cells. Details in population gating are described in materials and methods.

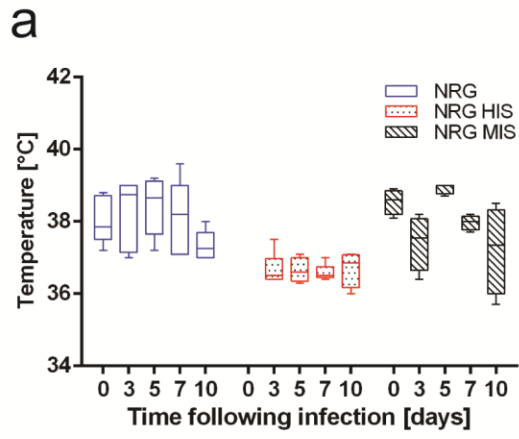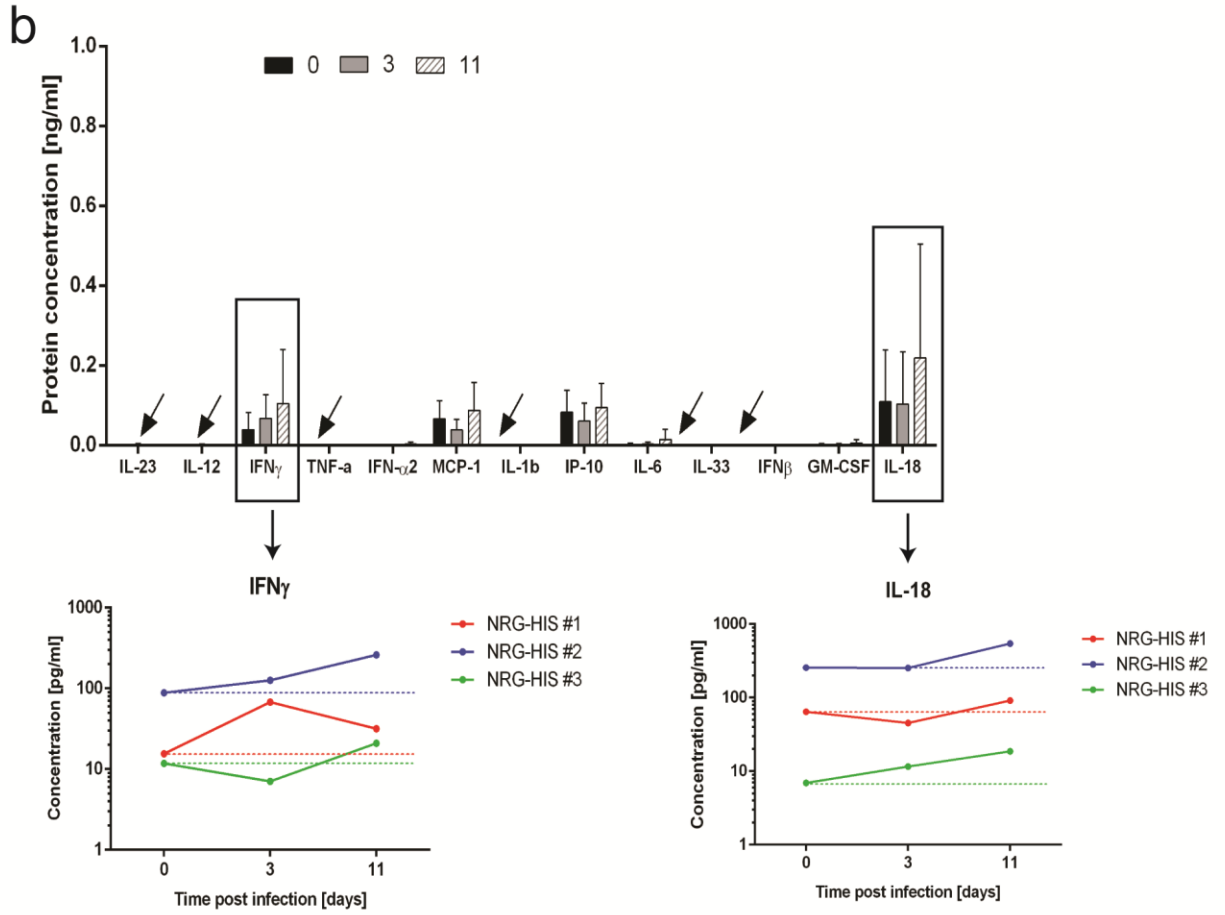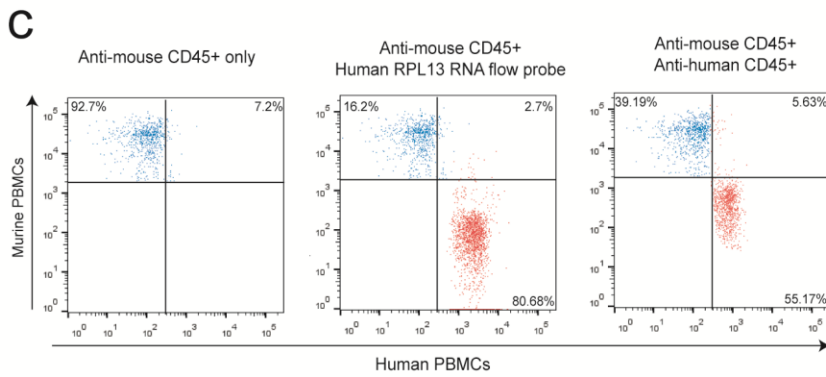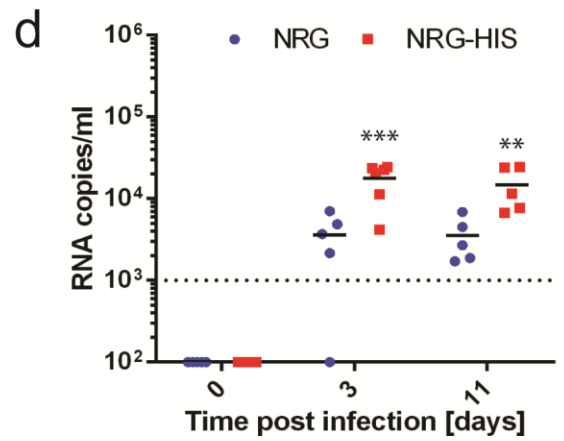

**Supplementary Figure 6.** **a.** Body temperature variation in NRG, NRG-HIS and NRG-MIS mice over the course of YFV-17D infection (Min to Max box and whiskers NRG and NRG-HIS, n=6 per group; NRG-MIS, n=4). **b.** Protein concentration of a panel of 13 human cytokines in the serum of NRG-HIS mice at days 0, 3 and 11 following YFV-17D infection. Cytokine concentrations of IFN $\gamma$  and IL-18 in the serum of each NRG-HIS mice (NRG-HIS #1-3) over the course of infection are also shown. Dotted lines represent the cytokine concentration prior to infection for each animal. (mean  $\pm$  SD; n=3). **c.** Total human and murine PBMCs of NRG-HIS mice were stained with anti-mouse CD45+ only (left), with anti-mouse CD45+ in combination with anti-human CD45+ (middle) or in combination with a human probe targeting RPL13 mRNA (right). Data are representative of three experiments. **d.** Serum viremia of NRG-HIS mice (red) used for YFV RNA flow at days 3 and 11 post infection. Serum viremia is compared to one of the non-engrafted NRG mice (blue) at similar time points. (+) RNA copies per ml of tissues were quantified by RT-qPCR. Medians are shown (n=5-6 per group; \*\* $p$ <0.01, \*\*\* $p$ <0.001; Two-way ANOVA test).

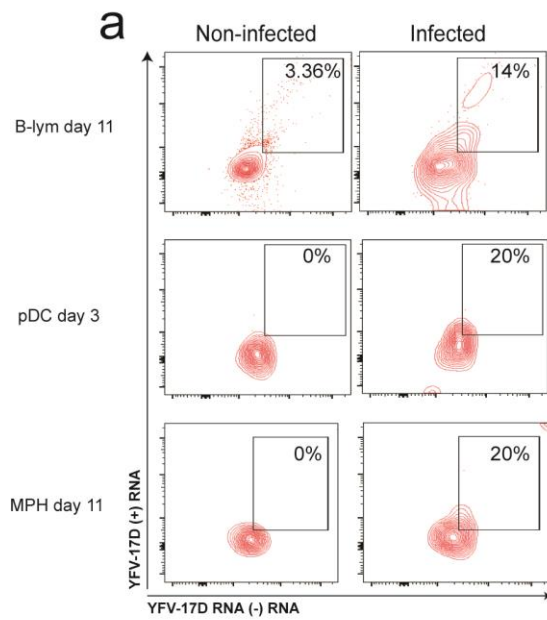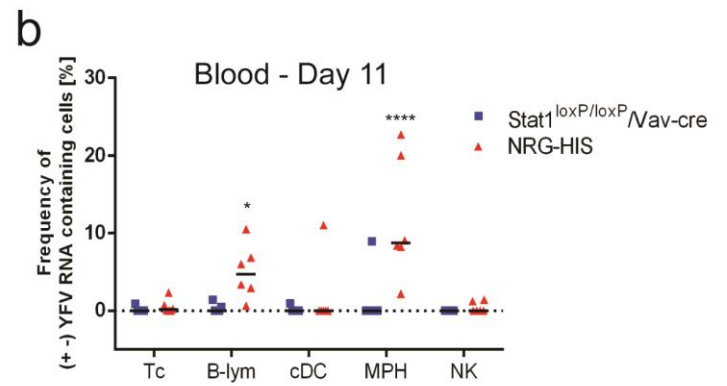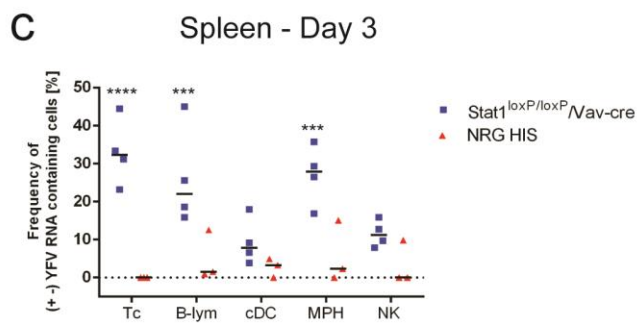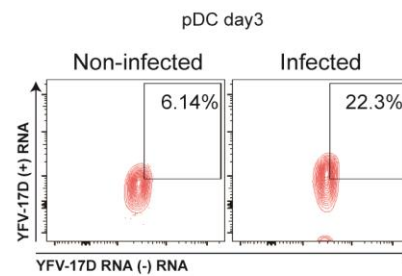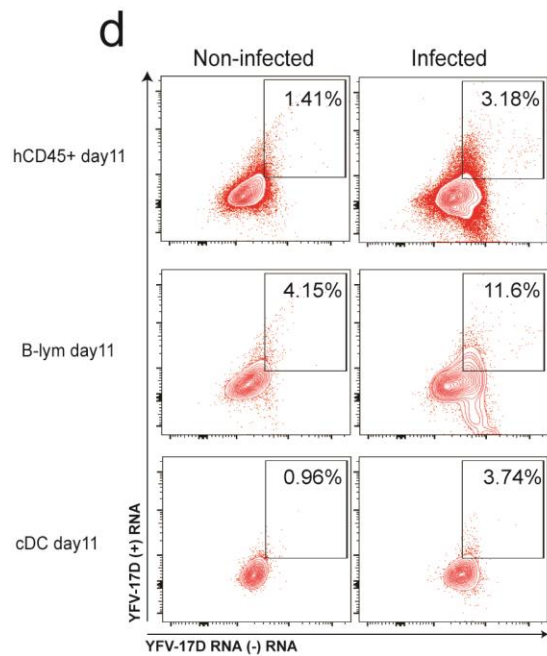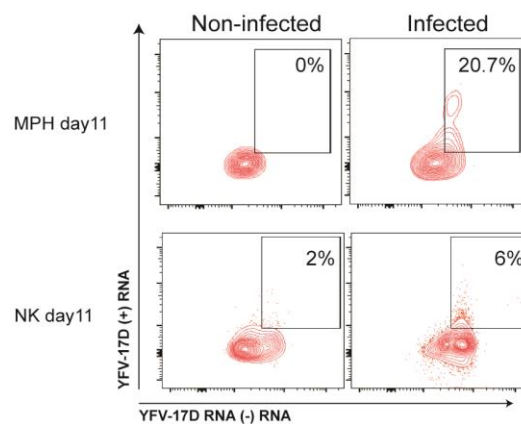

**Supplementary Figure 7. a.** Representative FACS plots displaying the frequencies of selected peripheral immune cell subsets containing both (+) and (-) YFV-17D RNA following YFV-17D infection of NRG-HIS mice. Frequencies from non-infected mice are also displayed. **b.** Frequency of cells containing both (+) and (-) YFV-17D RNA in five selected peripheral immune cell subsets isolated from the blood of  $\text{stat1}^{\text{loxP/loxP/Vav-cre}}$  mice and NRG-HIS mice at day 11 post infection. All frequencies were normalized to frequencies determined prior to infection for each animal ( $n=3-6$  per group;  $*p<0.05$ ,  $****p<0.0001$ ; Two-way ANOVA test). **c.** Frequency of cells containing both (+) and (-) YFV-17D RNA from five selected spleen-resident immune cell subsets isolated from the spleen of  $\text{stat1}^{\text{loxP/loxP/Vav-cre}}$  mice and NRG-HIS mice at day 3 post infection. Frequencies of YFV RNA-bearing cells were normalized to background staining in the equivalent cell populations in spleens of non-infected animals. Representative FACS plots displaying the frequencies of spleen-resident pDCs containing both (+) and (-) YFV-17D RNA following YFV-17D infection of NRG-HIS mice are shown at the right of the panel. Frequencies from non-infected mice are also displayed. ( $n=3-6$  per group;  $***p<0.001$ ,  $****p<0.0001$ ; Two-way ANOVA test). **d.** Representative FACS plots displaying the frequencies of selected spleen-resident immune cell subsets containing both (+) and (-) YFV-17D RNA at day 11 post infection following YFV-17D infection of NRG-HIS mice. Frequencies from non-infected mice are also displayed. Tc, CD3+ T cells; B-lym, CD19+ B cells; cDC, CD3- CD19- CD11c+ conventional dendritic cells; pDCs, CD3- CD19- CD123+ plasmacytoid dendritic cells; MPH, CD68+ macrophages; NK, CD3- CD19- CD56+ NK cells.

|                                                                        |                                            | <b>WT</b>            | <b>stat1<sup>loxP/loxP</sup>/Vav-cre</b>                           | <b>NRG-HIS</b>                |
|------------------------------------------------------------------------|--------------------------------------------|----------------------|--------------------------------------------------------------------|-------------------------------|
| <b>Serologic parameters</b>                                            | Viremia                                    | Low/N.D.             | Severe viremia at day 3, followed by a drop toward viral clearance | Persistence over time         |
|                                                                        | Cytokine                                   | Low/N.D.             | Peak at day 3 of pro-inflammatory cytokine                         | IL-18, IFN $\gamma$           |
| <b>Cell tropism</b>                                                    | General profile                            | Large tropism        | Large tropism                                                      | Restricted tropism            |
|                                                                        | T cells                                    | Spleen only          | Increased permissiveness in periphery                              | N.D.                          |
|                                                                        | NK cells                                   | Spleen mainly        | Increased permissiveness in spleen                                 | Spleen, minor                 |
|                                                                        | B cells                                    | Spleen only          | Increased permissiveness in spleen                                 | Spleen and periphery          |
|                                                                        | MPH                                        | Spleen and periphery | Increased permissiveness in periphery                              | Spleen and periphery          |
|                                                                        | cDC                                        | Spleen, minor        | Increased permissiveness in periphery                              | Spleen, minor                 |
|                                                                        | pDC                                        | -                    | -                                                                  | Spleen and periphery          |
| <b>Evolution and persistence of cell associated virus in periphery</b> | In periphery                               | Very low/N.D.        | Peak and clearance                                                 | Peak at day 3 and persistence |
|                                                                        | In spleen                                  | Maintenance          | Maintenance with increased replication in NK cells and B cells     | Slow increase over time       |
| <b>Immunological parameters</b>                                        | Evolution of T cell frequency in periphery | Stable               | Drop and strong increase                                           | Stable                        |
|                                                                        | Presence of activated T cells in spleen    | Yes                  | Yes; More Tem T cells                                              | Yes                           |

**Supplementary table 1. Cellular, immunological and serological features characterizing YFV-17D infection in WT mice, stat1<sup>loxP/loxP</sup>/Vav-cre mice and NRG-HIS mice.** In the cell tropism section, compartments (Periphery and/or Spleen) where each cell subsets is found to be permissive for YFV-17D replication is indicated. When the cell subset is a minor target in a specific compartment, the compartment is followed by “minor”. MPH, macrophages; cDC, conventional dendritic cells; pDC, plasmacytoid dendritic cells; Tem, effector memory T cells. N.D., non-detected; -, undetermined.

|                                                |                            |
|------------------------------------------------|----------------------------|
| <b>YFV-17D sense 1</b>                         | GCTAATTGAGGTGCATTGGTCTGC   |
| <b>YFV-17D sense 2</b>                         | GCTAATTGAGGTGTATTGGTCTGC   |
| <b>YFV-17D antisense 1</b>                     | CTGCTAATCGCTCAACGAACG      |
| <b>YFV-17D antisense 2</b>                     | CTGCTAATCGCTCAAAGAACG      |
| <b>YFV-17D probe</b>                           | ATCGAGTTGCTAGGCAATAAACAC   |
| <b>Mouse HPRT1 sense</b>                       | CCTGGCGTCGTGATTAGTGAT      |
| <b>Mouse HPRT1 antisense</b>                   | AGACGTTCAAGTCCTGTCCATAA    |
| <b>Mouse IL-12R sense</b>                      | ATGGCTGCTGCGTTGAGAA        |
| <b>Mouse IL-12R antisense</b>                  | AGCACTCATAGTCTGTCTTGGA     |
| <b>Mouse TNF-<math>\alpha</math> sense</b>     | CCCTCACACTCAGATCATCTTCT    |
| <b>Mouse TNF-<math>\alpha</math> antisense</b> | GCTACGACGTGGGCTACAG        |
| <b>Mouse KC sense</b>                          | CTGGGATTACCTCAAGAACATC     |
| <b>Mouse KC antisense</b>                      | CAGGGTCAAGGCAAGCCTC        |
| <b>Mouse MCP-1 sense</b>                       | TTAAAAACCTGGATCGGAACCAA    |
| <b>Mouse MCP-1 antisense</b>                   | GCATTAGCTTCAGATTTACGGGT    |
| <b>Mouse IP-10 sense</b>                       | CCAAGTGCTGCCGTCATTTTC      |
| <b>Mouse IP-10 antisense</b>                   | GGCTCGCAGGGATGATTTCAA      |
| <b>Mouse IL-6 sense</b>                        | TAGTCCTTCCTACCCCAATTTCC    |
| <b>Mouse IL-6 antisense</b>                    | TTGGTCCTTAGCCACTCCTTC      |
| <b>Mouse IFN<math>\beta</math> sense</b>       | CAGCTCCAAGAAAGGACGAAC      |
| <b>Mouse IFN<math>\beta</math> antisense</b>   | GGCAGTGTAAGTCTTCTGCAT      |
| <b>Mouse IL-33 sense</b>                       | TCCAAGTCCAAGATTTCCCGG      |
| <b>Mouse IL-33 antisense</b>                   | CATGCAGTAGACATGGCAGAA      |
| <b>Mouse GM-CSF sense</b>                      | GGCCTTGGAAGCATGTAGAGG      |
| <b>Mouse GM-CSF antisense</b>                  | GGAGAACTCGTTAGAGACGACTT    |
| <b>Vav-cre genotyping sense</b>                | TCCTGGGCATTGCCTACAAC       |
| <b>Vav-cre genotyping antisense</b>            | CTTCACTCTGATTCTGGCAATTTTCG |
| <b>Vav-cre genotyping probe</b>                | ACCCTGCTGCGCATTG           |
| <b>Alb-cre genotyping sense</b>                | GCGGTCTGGCAGTAAAACTATC     |
| <b>Alb-cre genotyping antisense</b>            | GTGAAACAGCATTGCTGTCACTT    |
| <b>Albv-cre genotyping probe</b>               | AAACATGCTTCATCGTCGGTCCGG   |

**Supplementary table 2. List of primers used in this study.**

| <b>Virus</b> | <b>RNA strand targeted</b> | <b>nucleotide sequence targeted</b>    | <b>Affymetrix Probe I.D.</b> |
|--------------|----------------------------|----------------------------------------|------------------------------|
| YFV-17D      | Positive strand            | 8144-9896 (1753bp)                     | VF1-17153                    |
| YFV-17D      | Negative strand            | 9910-10838 (929bp) / 7234-8073 (840bp) | VF4-20655                    |

**Supplementary table 3. Information related to the vRNA flow probes used in this study.**
